# Supplementary material
Source: MDPI journal article supplement (https://www.mdpi.com/2071-1050/13/11/5931)
Supplement: s1 [file s1 › sustainability-1213933-supplementary materials-revised.pdf]

## Supplementary Material

### Investigating the Impact of Regional Temperature on COVID-19 Pandemic During 2020

Murk Marvi, Asad Arfeen, Mohammed Raza Mehdi, and Zahid Rauf

May 12, 2021

In order to further support the research presented in the paper and for verification of the results, we performed a number of experiments by making slightly different assumptions.

In order to analyze the relationship between average temperature and new cases (NC) reported per day for the current week, the scatter plots are reported in Figure S1 by considering data from January to March 2020. Figure S1a depicts the average NC reported in the current week ( $NC_{cw}$ ) against average temperature of the current week ( $T_{cw}$ ), whereas Figure S1b depicts  $NC_{cw}$  against the average temperature of the past week ( $T_{pw}$ ). Here, by the current week we mean the past 7 days, and by the past week we mean the past 8 to 15 days. The similar patterns are observed in both the plots reported in Figure S1, that is, the locations bearing temperature in a moderate range has reported on average a higher number of cases.

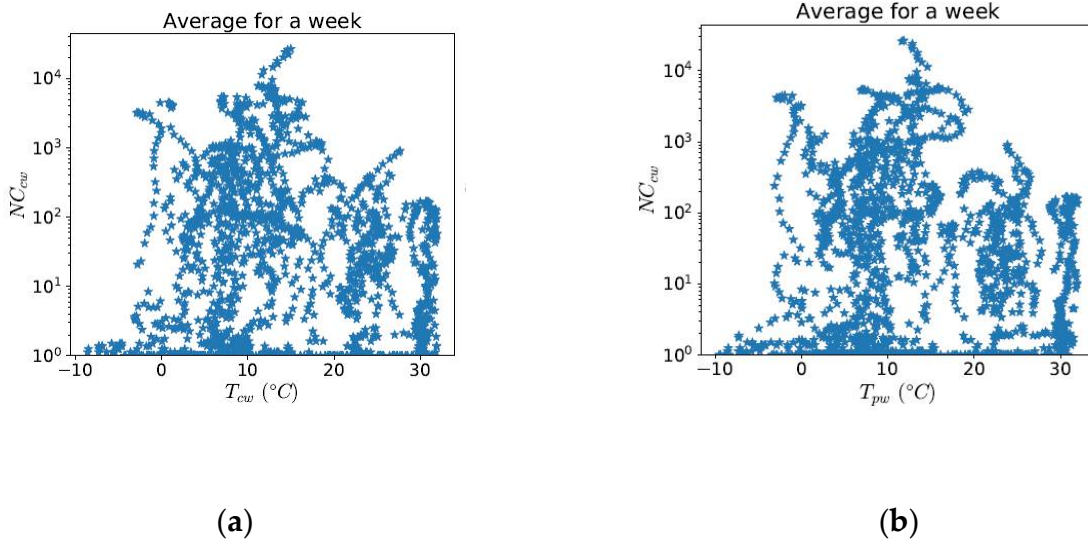

**Figure S1.** Scatter plot of average NC reported in the current week ( $NC_{cw}$ ) in each location against: (a) average temperature of the current week ( $T_{cw}$ ), (b) average temperature of the past week ( $T_{pw}$ ).

We fit simple linear models by assuming  $NC_{cw}$  as a dependent and  $T_{cw}$  or  $T_{pw}$  as an independent variable, and the results are reported in Table S1. A significant inverse relationship has been observed between  $NC_{cw}$  and  $T_{cw}$ , and it is in accordance with the results reported in Section 5.2 where NC reported per day is considered as a dependent

variable instead of  $NC_{cw}$ . Moreover, a significant relationship has not been observed between  $NC_{cw}$  and  $T_{pw}$ . This implies that average temperature of the past week has not significantly affected the average NC reported in the current week.

**Table S1.** Analysis of simple linear models obtained by assuming  $NC_{cw}$  or  $ND_{cw}$  as a dependent and  $T_{cw}$  or  $T_{pw}$  as an independent variable.

| $\widehat{NC}_{cw} = \beta_0^c + \beta_1^c T_{cw}$ |         | $\widehat{NC}_{cw} = \beta_0^c + \beta_1^c T_{pw}$ |         | $\widehat{ND}_{cw} = \beta_0^d + \beta_1^d T_{cw}$ |         | $\widehat{ND}_{cw} = \beta_0^d + \beta_1^d T_{pw}$ |         |
|----------------------------------------------------|---------|----------------------------------------------------|---------|----------------------------------------------------|---------|----------------------------------------------------|---------|
| $(\beta_0^c, \beta_1^c)$                           | p-value | $(\beta_0^c, \beta_1^c)$                           | p-value | $(\beta_0^d, \beta_1^d)$                           | p-value | $(\beta_0^d, \beta_1^d)$                           | p-value |
| (6879, -51.58)                                     | 0.006   | (6067, -9.64)                                      | 0.61    | (126.4, -0.25)                                     | 0.387   | (118, 0.186)                                       | 0.517   |

We also fit simple linear models by assuming average of new deaths (ND) reported in the current week ( $ND_{cw}$ ) as a dependent and  $T_{cw}$  or  $T_{pw}$  as an independent variable, and the results are reported in Table S1. A significant relationship has not been observed between  $ND_{cw}$  and  $T_{cw}$ , and it is in accordance with the results reported in Section 5.2 where ND reported per day is considered as a dependent variable instead of  $ND_{cw}$ . Similarly, a significant relationship has not been observed between  $ND_{cw}$  and  $T_{pw}$ . This implies that average temperature of the past week has not significantly affected the average ND reported in the current week.

Although the main focus of the manuscript is about investigating the impact of regional temperature on COVID-19 pandemic, for additional insights we also fit simple linear models by assuming average relative humidity (RH) of the current week ( $H_{cw}$ ) or the past week ( $H_{pw}$ ) as an independent variable. From the results reported in Table S2, a significant positive relationship has been observed between  $NC_{cw}$  and  $T_{cw}$  or  $T_{pw}$ . Similarly, a significant inverse relationship has been observed between  $ND_{cw}$  and  $T_{cw}$  or  $T_{pw}$ .

**Table S2.** Analysis of simple linear models obtained by assuming  $NC_{cw}$  or  $ND_{cw}$  as a dependent and  $H_{cw}$  or  $H_{pw}$  as an independent variable.

| $\widehat{NC}_{cw} = \beta_0^c + \beta_1^c H_{cw}$ |         | $\widehat{NC}_{cw} = \beta_0^c + \beta_1^c H_{pw}$ |         | $\widehat{ND}_{cw} = \beta_0^d + \beta_1^d H_{cw}$ |         | $\widehat{ND}_{cw} = \beta_0^d + \beta_1^d H_{pw}$ |         |
|----------------------------------------------------|---------|----------------------------------------------------|---------|----------------------------------------------------|---------|----------------------------------------------------|---------|
| $(\beta_0^c, \beta_1^c)$                           | p-value | $(\beta_0^c, \beta_1^c)$                           | p-value | $(\beta_0^d, \beta_1^d)$                           | p-value | $(\beta_0^d, \beta_1^d)$                           | p-value |
| (2856, 45)                                         | 0.00    | (3384, 37.9)                                       | 0.00    | (167.2, -0.68)                                     | 0.00    | (174, -0.78)                                       | 0.00    |

We perform multiple LR analysis by assuming nineteen independent variables defined in Table 2 and  $NC_{cw}$  as a dependent variable. The results of multiple LR analysis performed by assuming average temperature and RH of the current week ( $T_{cw}, H_{cw}$ ) are reported in Figure S2a. Moreover, the results of multiple LR analysis performed by assuming average temperature and RH of the past week ( $T_{pw}, H_{pw}$ ) are reported in Figure S2b. A significant inverse relationship has been observed between  $NC_{cw}$  and  $T_{cw}$  or  $T_{pw}$ . This is in accordance with the results reported in Section 5.3 wherein the number of NC reported per day is considered as a dependent variable. Moreover, a significant relationship between  $NC_{cw}$  and  $T_{cw}$  or  $T_{pw}$  has not been observed. This is also in accordance with the results reported in Section 5.3.

We also perform multiple LR analysis by assuming nineteen independent variables defined in Table 2 and  $ND_{cw}$  as a dependent variable. The results of multiple LR analysis performed by assuming average temperature and RH of the current week ( $T_{cw}, H_{cw}$ ) are reported in Figure S3a. Moreover, the results of multiple LR analysis performed by assuming average temperature and RH of the past week ( $T_{pw}, H_{pw}$ ) are reported in Figure S3b. A significant inverse relationship has been observed between  $ND_{cw}$  and  $T_{cw}$  or  $T_{pw}$ . This is in accordance with the results reported in Section 5.3 wherein the number of ND reported per day is considered as a dependent variable. Moreover, a significant relationship between  $ND_{cw}$  and  $T_{cw}$  or  $T_{pw}$  has not been observed. This is also in accordance with the results reported in Section 5.3.

In a nutshell, the following insights are extracted from the above mentioned analysis.

- Under simple LR analysis, a significant inverse relationship has been observed between  $NC_{cw}$  and  $T_{cw}$ . However, a significant relationship has not been observed between  $NC_{cw}$  and  $T_{pw}$ . This implies that the variations in average temperature of the past week have not significantly affected the average NC reported in the current week. Similarly, a significant relationship between  $ND_{cw}$  and  $T_{cw}$  or  $T_{pw}$  has not been observed. This implies that the variations in average temperature of the current or past week have not significantly affected the average ND reported in the current week.
- Under multiple LR analysis, a significant inverse relationship has been observed between  $NC_{cw}$  and  $T_{cw}$  or  $T_{pw}$ . Similarly, a significant inverse relationship has been observed between  $ND_{cw}$  and  $T_{cw}$  or  $T_{pw}$ . This implies that the variations in average temperature of the current or past week have significantly affected the average NC or ND reported in the current week.
- Under simple LR analysis, a significant positive relationship has been observed between  $NC_{cw}$  and  $H_{cw}$  or  $H_{pw}$ . Similarly, a significant inverse relationship has been observed between  $ND_{cw}$  and  $H_{cw}$  or  $H_{pw}$ . This implies that the variations in average RH of the current or past week have significantly affected the average NC or ND reported in the current week.
- However, under multiple LR analysis, a significant relationship between  $NC_{cw}$  and  $H_{cw}$  or  $H_{pw}$  has not been observed. Similarly, a significant relationship between  $ND_{cw}$  and  $H_{cw}$  or  $H_{pw}$  has not been observed.

From above insights, it is evident that  $NC_{cw}$  has shown a significant inverse relationship with average temperature under all the conducted analysis except one. Similarly,  $ND_{cw}$  has shown either a significant inverse or an insignificant relationship with average temperature depending on the conducted analysis. Moreover,  $NC_{cw}$  has shown either a significant positive or an insignificant relationship with average RH depending on the conducted analysis. Similarly,  $ND_{cw}$  has shown either a significant inverse or an insignificant relationship with average RH depending on the conducted analysis.

| OLS Regression Results     |               |                     |       |
|----------------------------|---------------|---------------------|-------|
| Dep. Variable:             | avg_NCCW      | R-squared:          | 0.763 |
| Model:                     | OLS           | F-statistic:        | 1715. |
| Method:                    | Least Squares | Prob (F-statistic): | 0.00  |
| No. Observations:          | 10122         |                     |       |
| Df Residuals:              | 10102         |                     |       |
| Df Model:                  | 19            |                     |       |
|                            |               |                     |       |
|                            | coef          | t                   | P> t  |
| Intercept                  | 9222.5548     | 2.767               | 0.006 |
| total_cases                | 0.0086        | 52.602              | 0.000 |
| total_deaths               | 0.0279        | 3.602               | 0.000 |
| total_cases_per_million    | 0.0869        | 6.058               | 0.000 |
| total_deaths_per_million   | -3.8951       | -5.394              | 0.000 |
| population                 | 1.869e-06     | 5.251               | 0.000 |
| population_density         | -0.0224       | -0.276              | 0.782 |
| median_age                 | -216.1237     | -4.537              | 0.000 |
| aged_65_older              | 103.4816      | 0.680               | 0.496 |
| aged_70_older              | 344.3180      | 1.676               | 0.094 |
| gdp_per_capita             | -0.0098       | -1.236              | 0.217 |
| cardiovasc_death_rate      | -4.5922       | -2.558              | 0.011 |
| diabetes_prevalence        | 141.2690      | 3.235               | 0.001 |
| female_smokers             | 2.7390        | 0.172               | 0.864 |
| male_smokers               | 35.4353       | 3.321               | 0.001 |
| hospital_beds_per_thousand | -193.1478     | -4.436              | 0.000 |
| life_expectancy            | -214.0369     | -4.112              | 0.000 |
| human_development_index    | 1.43e+04      | 4.433               | 0.000 |
| avg_TCW                    | -29.5960      | -2.398              | 0.017 |
| avg_HCW                    | -0.1932       | -0.030              | 0.976 |

(a)

| OLS Regression Results     |               |                     |       |
|----------------------------|---------------|---------------------|-------|
| Dep. Variable:             | avg_NCCW      | R-squared:          | 0.763 |
| Model:                     | OLS           | F-statistic:        | 1715. |
| Method:                    | Least Squares | Prob (F-statistic): | 0.00  |
| No. Observations:          | 10122         |                     |       |
| Df Residuals:              | 10102         |                     |       |
| Df Model:                  | 19            |                     |       |
|                            |               |                     |       |
|                            | coef          | t                   | P> t  |
| Intercept                  | 9481.7515     | 2.847               | 0.004 |
| total_cases                | 0.0086        | 52.679              | 0.000 |
| total_deaths               | 0.0282        | 3.654               | 0.000 |
| total_cases_per_million    | 0.0879        | 6.143               | 0.000 |
| total_deaths_per_million   | -3.9376       | -5.449              | 0.000 |
| population                 | 1.85e-06      | 5.197               | 0.000 |
| population_density         | -0.0176       | -0.218              | 0.828 |
| median_age                 | -215.3716     | -4.521              | 0.000 |
| aged_65_older              | 96.3051       | 0.633               | 0.526 |
| aged_70_older              | 355.0971      | 1.729               | 0.084 |
| gdp_per_capita             | -0.0097       | -1.230              | 0.219 |
| cardiovasc_death_rate      | -4.7774       | -2.658              | 0.008 |
| diabetes_prevalence        | 143.2411      | 3.282               | 0.001 |
| female_smokers             | 1.1760        | 0.074               | 0.941 |
| male_smokers               | 36.8398       | 3.450               | 0.001 |
| hospital_beds_per_thousand | -196.3724     | -4.511              | 0.000 |
| life_expectancy            | -214.5241     | -4.123              | 0.000 |
| human_development_index    | 1.421e+04     | 4.425               | 0.000 |
| avg_TPW                    | -35.7133      | -2.947              | 0.003 |
| avg_HPW                    | -1.1398       | -0.175              | 0.861 |

(b)

**Figure S2.** Results of multiple LR analysis by assuming  $NC_{cw}$  as a dependent variable. (a) By considering average temperature and RH of the current week. (b) By considering average temperature and RH of the past week. Here, the considered variables are said to be significantly affecting the dependent variable  $NC_{cw}$  if the corresponding  $p$ -value ( $P > |t|$ ) is smaller than  $\alpha = 0.05$ .

| OLS Regression Results     |               |                     |       |
|----------------------------|---------------|---------------------|-------|
| Dep. Variable:             | avg_NDCW      | R-squared:          | 0.665 |
| Model:                     | OLS           | F-statistic:        | 1057. |
| Method:                    | Least Squares | Prob (F-statistic): | 0.00  |
| No. Observations:          | 10122         |                     |       |
| Df Residuals:              | 10102         |                     |       |
| Df Model:                  | 19            |                     |       |
|                            |               |                     |       |
|                            | coef          | t                   | P> t  |
| Intercept                  | 425.9804      | 7.078               | 0.000 |
| total_cases                | -1.257e-05    | -4.282              | 0.000 |
| total_deaths               | 0.0060        | 42.803              | 0.000 |
| total_cases_per_million    | 0.0021        | 8.294               | 0.000 |
| total_deaths_per_million   | -0.1351       | -10.358             | 0.000 |
| population                 | 3.826e-08     | 5.953               | 0.000 |
| population_density         | 0.0053        | 3.592               | 0.000 |
| median_age                 | 1.0783        | 1.254               | 0.210 |
| aged_65_older              | -5.7438       | -2.091              | 0.037 |
| aged_70_older              | 6.9150        | 1.864               | 0.062 |
| gdp_per_capita             | -0.0011       | -7.603              | 0.000 |
| cardiovasc_death_rate      | 0.0488        | 1.504               | 0.133 |
| diabetes_prevalence        | 3.1889        | 4.043               | 0.000 |
| female_smokers             | 1.7311        | 6.008               | 0.000 |
| male_smokers               | -2.1962       | -11.398             | 0.000 |
| hospital_beds_per_thousand | 0.8374        | 1.065               | 0.287 |
| life_expectancy            | -4.8995       | -5.213              | 0.000 |
| human_development_index    | 32.8602       | 0.564               | 0.573 |
| avg_TCW                    | -1.4608       | -6.554              | 0.000 |
| avg_HCW                    | 0.1562        | 1.340               | 0.180 |

(a)

| OLS Regression Results     |               |                     |       |
|----------------------------|---------------|---------------------|-------|
| Dep. Variable:             | avg_NDCW      | R-squared:          | 0.665 |
| Model:                     | OLS           | F-statistic:        | 1057. |
| Method:                    | Least Squares | Prob (F-statistic): | 0.00  |
| No. Observations:          | 10122         |                     |       |
| Df Residuals:              | 10102         |                     |       |
| Df Model:                  | 19            |                     |       |
|                            |               |                     |       |
|                            | coef          | t                   | P> t  |
| Intercept                  | 421.7026      | 7.013               | 0.000 |
| total_cases                | -1.242e-05    | -4.237              | 0.000 |
| total_deaths               | 0.0060        | 42.869              | 0.000 |
| total_cases_per_million    | 0.0022        | 8.524               | 0.000 |
| total_deaths_per_million   | -0.1362       | -10.436             | 0.000 |
| population                 | 3.796e-08     | 5.906               | 0.000 |
| population_density         | 0.0052        | 3.571               | 0.000 |
| median_age                 | 1.1188        | 1.301               | 0.193 |
| aged_65_older              | -5.8824       | -2.143              | 0.032 |
| aged_70_older              | 7.0876        | 1.911               | 0.056 |
| gdp_per_capita             | -0.0011       | -7.731              | 0.000 |
| cardiovasc_death_rate      | 0.0490        | 1.511               | 0.131 |
| diabetes_prevalence        | 3.1930        | 4.052               | 0.000 |
| female_smokers             | 1.7160        | 5.952               | 0.000 |
| male_smokers               | -2.1907       | -11.362             | 0.000 |
| hospital_beds_per_thousand | 0.8119        | 1.033               | 0.302 |
| life_expectancy            | -4.8828       | -5.197              | 0.000 |
| human_development_index    | 35.0698       | 0.605               | 0.545 |
| avg_TPW                    | -1.4976       | -6.844              | 0.000 |
| avg_HPW                    | 0.1704        | 1.453               | 0.146 |

(b)

**Figure S3.** Results of multiple LR analysis by assuming  $ND_{cw}$  as a dependent variable. (a) By considering average temperature and RH of the current week. (b) By considering average of temperature and RH for the past week. Here, the considered variables are said to be significantly affecting the dependent variable  $ND_{cw}$  if the corresponding  $p$ -value ( $P > |t|$ ) is smaller than  $\alpha = 0.05$ .
